# Supplementary material
Source: PubMed Central journal article supplement (PMC4175720)
Supplement: NIHMS410988-supplement-1.pdf [file NIHMS410988-supplement-1.pdf]

**Table S1. Nucleotide Differences between 129/SvEv and NZB/BINJ Mitochondrial DNA**

| <b>Gene</b>         | <b>Polymorphism (amino acid change)</b>                                                                                      |
|---------------------|------------------------------------------------------------------------------------------------------------------------------|
| tRNA <sup>Phe</sup> | G55A                                                                                                                         |
| rRNA 16S            | A1353G, G1519A, G1590A, T1822C, T2201C, G2340A, C2525T                                                                       |
| ND1                 | A2766G (Ile6Ala), T2767C (Ile6Ala), C2798T, T2814C, C2840T, C2934T(Arg62His), T3194C, A3260G, T3422C, T3467C, T3599C, A3692G |
| ND2                 | G3932A (Ala7Thr), C4123T, G4276A, T4324C, G4408A, A4706G(Ile265Val), C4732T, T4771C, A4885C, T4903G                          |
| tRNA <sup>Cys</sup> | 5205insG                                                                                                                     |
| COI                 | G5463A(Ala46Thr), T5552C, G5930A, T6041C, C6407T, A6470G, C6575T, G6620S, G6785A                                             |
| COII                | A7411G                                                                                                                       |
| ATP8                | G7870A                                                                                                                       |
| ATP6                | A8439G, T8467C, C8568T                                                                                                       |
| COIII               | T8858C, C8864T, A9137G, T9152C                                                                                               |
| tRNA <sup>Gly</sup> | A9391G                                                                                                                       |
| ND3                 | T9461C, C9530T, C9581T, A9599G                                                                                               |
| tRNA <sup>Arg</sup> | 9830insA, 9831insA                                                                                                           |
| ND4L                | G9985A(Val37Met)                                                                                                             |
| ND4                 | C10547T, A10583G, C10952A(Ile262Met)                                                                                         |
| ND5                 | G11843A, C11846T, A11933C, C12353T, T12575A, A12695G, T12835C(Ile365Thr), A12890G, G13004A, C13444T(Thr568Ile)               |
| ND6                 | T13612C, C13689T(Val128Ile), A13784G(Ile97Ala), A13785G(Ile97Ala), A13837G, A13983G                                          |
| CYTB                | G14211A(Ala23Thr), G14642A, C14738T, G15264A(Glu373Lys)                                                                      |
| Control Region      | T15499A, C15549T, A15578T, C15588T, C15603T, T15657C, C15917T, A16017C, 16245insA, A16268G, T16272C                          |
